# Supplementary material
Source: PubMed Central journal article supplement (PMC2834471)
Supplement: JCO.2009.25.6081_1.pdf [file JCO.2009.25.6081_1.pdf]

# Long-Term Follow-Up of Autotransplant Trials for Multiple Myeloma: Update of Protocols Conducted by the Intergroupe Francophone Du Myelome, Southwest Oncology Group, and University of Arkansas For Medical Sciences

Barlogie et al

Data Supplement Figure 1:  
Reiterative Kaplan-Meier analyses applying progressively longer follow-up times

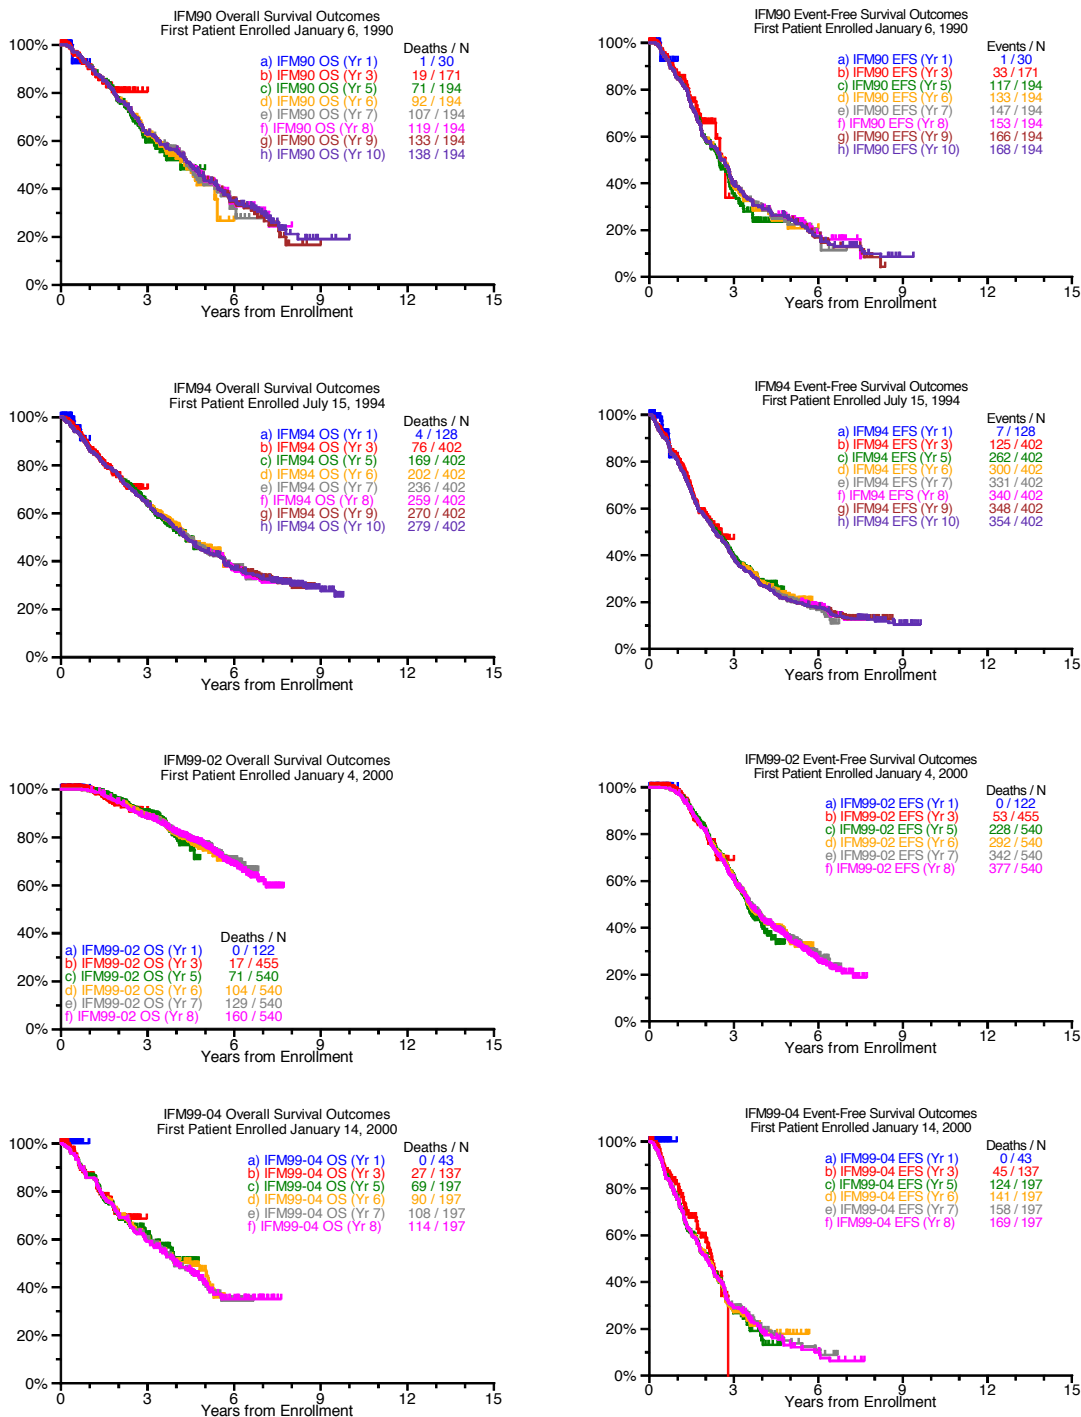

Data Supplement Figure 1 (continued):  
 Reiterative Kaplan-Meier analyses applying progressively longer follow-up times

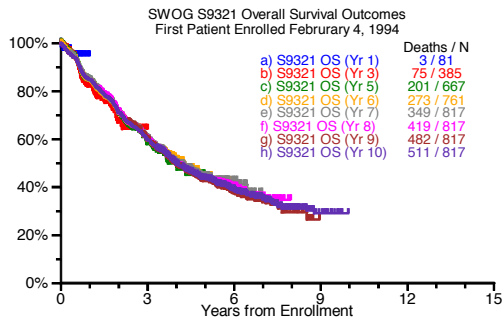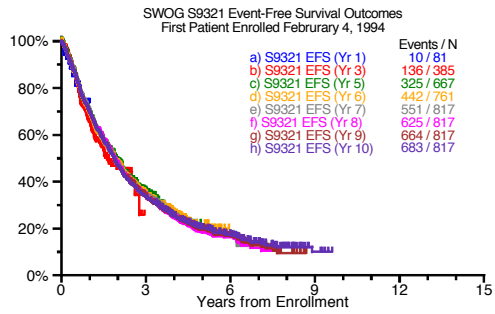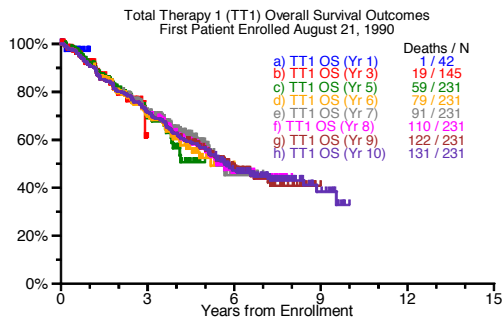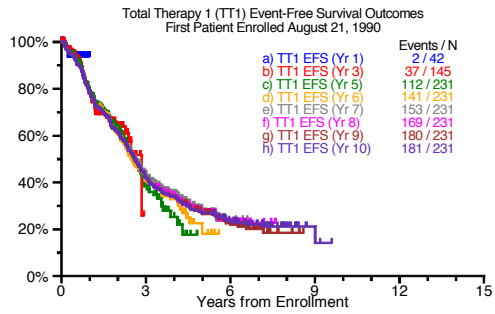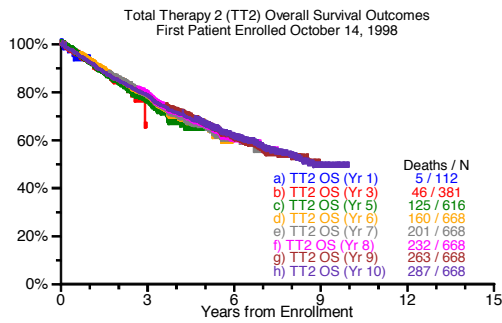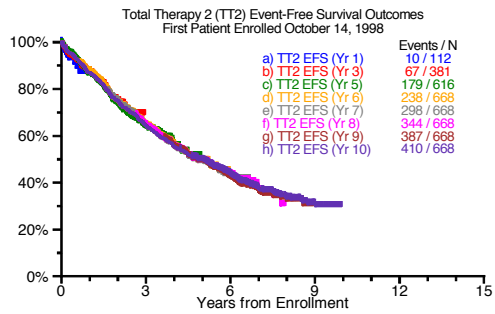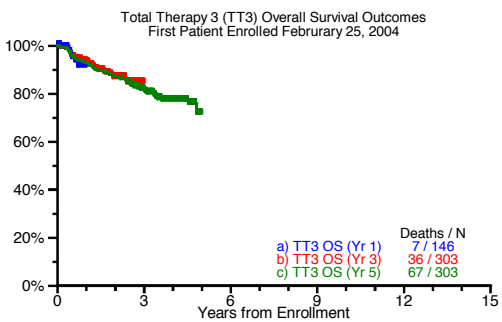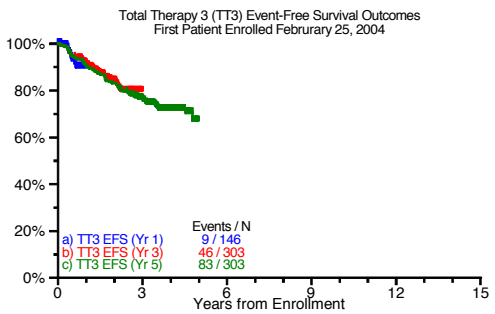

Data Supplement Figure 2: Randomized clinical trial outcomes in terms of overall survival (left panels) and event-free survival (right panels)

Figure 2a: IFM90

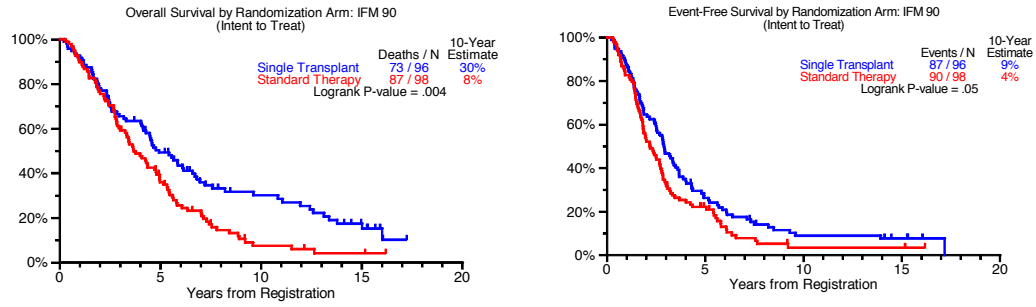

Figure 2b: IFM94

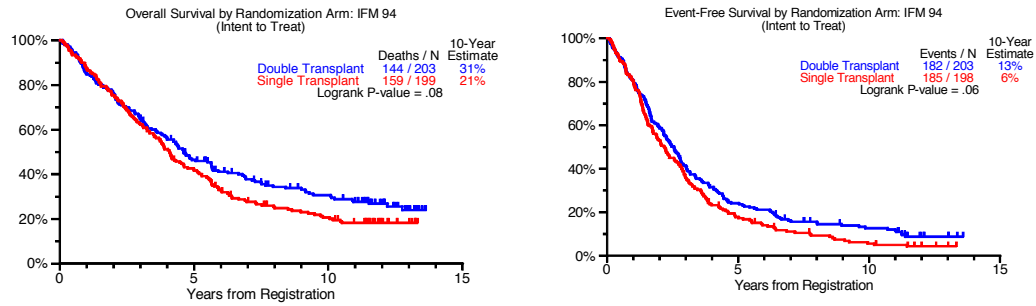

Figure 2c: S9321

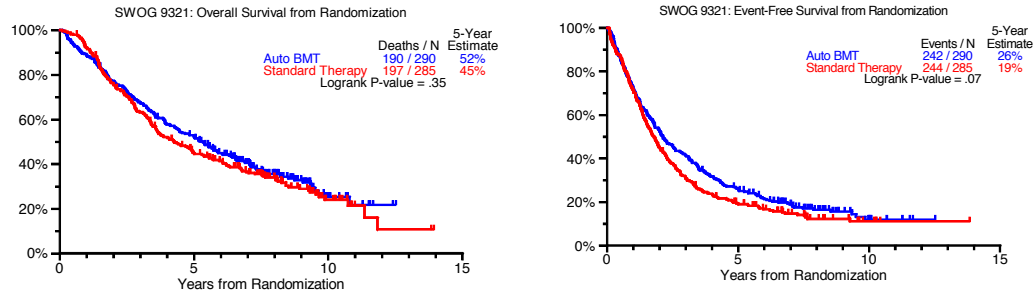

Figure 2d: TT2

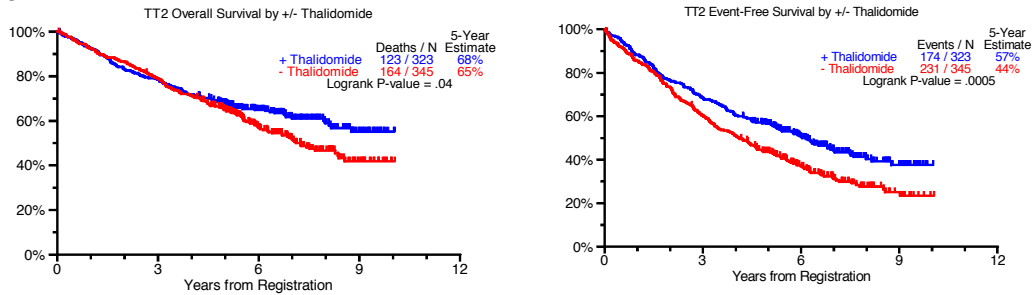

Figure 2e: IFM9902

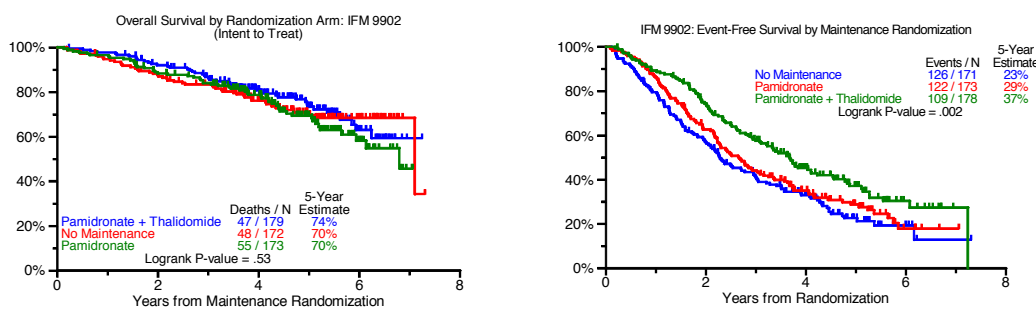

**Data Supplement Table 1: Univariate and multivariate analyses of baseline and treatment features associated with survival outcomes in context of trials grouped together as tandem transplant and tandem transplant plus thalidomide categories:**

|                                                                                                                                                                                                                                                                                                                                                                                                                                                                                                                                                                                                                                                                                                                                                                                                                                                                                                                                                                                                    |                                           |                        | Overall Survival        |                 |
|----------------------------------------------------------------------------------------------------------------------------------------------------------------------------------------------------------------------------------------------------------------------------------------------------------------------------------------------------------------------------------------------------------------------------------------------------------------------------------------------------------------------------------------------------------------------------------------------------------------------------------------------------------------------------------------------------------------------------------------------------------------------------------------------------------------------------------------------------------------------------------------------------------------------------------------------------------------------------------------------------|-------------------------------------------|------------------------|-------------------------|-----------------|
|                                                                                                                                                                                                                                                                                                                                                                                                                                                                                                                                                                                                                                                                                                                                                                                                                                                                                                                                                                                                    | Variable                                  | n/N (%)                | HR (95% CI)             | P-value         |
| <b>Univariate</b>                                                                                                                                                                                                                                                                                                                                                                                                                                                                                                                                                                                                                                                                                                                                                                                                                                                                                                                                                                                  | <b>Tandem transplant</b>                  | 2294/3508 (65%)        | 0.56 (0.51,0.61)        | <.001           |
|                                                                                                                                                                                                                                                                                                                                                                                                                                                                                                                                                                                                                                                                                                                                                                                                                                                                                                                                                                                                    | <b>Tandem transplant with thalidomide</b> | 626/3508 (18%)         | 0.56 (0.48,0.65)        | <.001           |
|                                                                                                                                                                                                                                                                                                                                                                                                                                                                                                                                                                                                                                                                                                                                                                                                                                                                                                                                                                                                    | <b>Age ≥ 60 yr</b>                        | 985/3508 (28%)         | 1.34 (1.21,1.48)        | <.001           |
|                                                                                                                                                                                                                                                                                                                                                                                                                                                                                                                                                                                                                                                                                                                                                                                                                                                                                                                                                                                                    | <b>Albumin &lt; 3.5 g/dL</b>              | 893/3367 (27%)         | 1.42 (1.29,1.57)        | <.001           |
|                                                                                                                                                                                                                                                                                                                                                                                                                                                                                                                                                                                                                                                                                                                                                                                                                                                                                                                                                                                                    | <b>B2M ≥ 3.5 mg/L</b>                     | 1504/3422 (44%)        | 1.80 (1.64,1.97)        | <.001           |
|                                                                                                                                                                                                                                                                                                                                                                                                                                                                                                                                                                                                                                                                                                                                                                                                                                                                                                                                                                                                    | <b>B2M &gt; 5.5 mg/L</b>                  | 745/3422 (22%)         | 1.94 (1.76,2.15)        | <.001           |
|                                                                                                                                                                                                                                                                                                                                                                                                                                                                                                                                                                                                                                                                                                                                                                                                                                                                                                                                                                                                    | <b>Hb &lt; 10 g/dL</b>                    | 1188/3422 (35%)        | 1.59 (1.45,1.75)        | <.001           |
|                                                                                                                                                                                                                                                                                                                                                                                                                                                                                                                                                                                                                                                                                                                                                                                                                                                                                                                                                                                                    | <b>LDH ≥ ULN</b>                          | 955/3178 (30%)         | 1.41 (1.27,1.56)        | <.001           |
| <b>Multivariate</b>                                                                                                                                                                                                                                                                                                                                                                                                                                                                                                                                                                                                                                                                                                                                                                                                                                                                                                                                                                                | <i>Tandem transplant</i>                  | <i>2033/3077 (66%)</i> | <i>0.61 (0.55,0.68)</i> | <i>&lt;.001</i> |
|                                                                                                                                                                                                                                                                                                                                                                                                                                                                                                                                                                                                                                                                                                                                                                                                                                                                                                                                                                                                    | <i>Tandem transplant with thalidomide</i> | <i>623/3077 (20%)</i>  | <i>0.69 (0.58,0.81)</i> | <i>&lt;.001</i> |
|                                                                                                                                                                                                                                                                                                                                                                                                                                                                                                                                                                                                                                                                                                                                                                                                                                                                                                                                                                                                    | <b>Age ≥ 60 yr</b>                        | <b>862/3077 (28%)</b>  | <b>1.42 (1.27,1.58)</b> | <b>&lt;.001</b> |
|                                                                                                                                                                                                                                                                                                                                                                                                                                                                                                                                                                                                                                                                                                                                                                                                                                                                                                                                                                                                    | <b>Albumin &lt; 3.5 g/dL</b>              | <b>808/3077 (26%)</b>  | <b>1.15 (1.03,1.28)</b> | <b>0.011</b>    |
|                                                                                                                                                                                                                                                                                                                                                                                                                                                                                                                                                                                                                                                                                                                                                                                                                                                                                                                                                                                                    | <b>B2M ≥ 3.5 mg/L</b>                     | <b>1320/3077 (43%)</b> | <b>1.44 (1.30,1.60)</b> | <b>&lt;.001</b> |
|                                                                                                                                                                                                                                                                                                                                                                                                                                                                                                                                                                                                                                                                                                                                                                                                                                                                                                                                                                                                    | <b>Hb &lt; 10 g/dL</b>                    | <b>1060/3077 (34%)</b> | <b>1.19 (1.07,1.32)</b> | <b>0.002</b>    |
|                                                                                                                                                                                                                                                                                                                                                                                                                                                                                                                                                                                                                                                                                                                                                                                                                                                                                                                                                                                                    | <b>LDH ≥ ULN</b>                          | <b>924/3077 (30%)</b>  | <b>1.37 (1.24,1.52)</b> | <b>&lt;.001</b> |
| <p>HR- Hazard Ratio, 95% CI- 95% Confidence Interval, P-value from Wald Chi-Square Test in Cox Regression<br/> NS2- Multivariate results not statistically significant at 0.05 level.<br/> All univariate p-values reported regardless of significance.<br/> Multivariate model uses stepwise selection with entry level 0.1 and variable remains if meets the 0.05 level.<br/> A multivariate p-value greater than 0.05 indicates variable forced into model with significant variables chosen using stepwise selection.<br/> Variables considered for multivariate model were: Tandem transplant, Tandem transplant with thalidomide, Age ≥ 60 yr, Albumin &lt; 3.5 g/dL, B2M ≥ 3.5 mg/L, Hb &lt; 10 g/dL, LDH ≥ ULN.<br/> Tandem transplant includes patients enrolled on TT1, TT2, TT3, IFM 99-02, and IFM 99-04, and those randomized to receive a tandem transplant on IFM 94.<br/> Tandem transplant with thalidomide includes patients enrolled on TT3 and the thalidomide arm of TT2.</p> |                                           |                        |                         |                 |
